# Supplementary material
Source: Elsevier journal article supplement (https://www.sciencedirect.com/science/article/pii/S1134009616300778)
Supplement: mmc1 [file S1134009616300778:mmc1.doc]

**ANEXO I:** LISTADO de VARIABLES (con sus VALORES) del REGISTRO de ASISTENCIAS SECTCV

**DATOS DEMOGRÁFICOS**

*Identificación Paciente* Nº Orden Registro de Asistencias

*Centro Implante* Código Centro

*Nombre y Apellidos* Iniciales

*Fecha Nacimiento* DD-MM-AA

*Edad* Cálculo automático NO RELLENAR

*Sexo* 1=Varón 2=Mujer

*Peso* Kg.

*Talla*  cm.

**FECHAS**

*Fecha y hora Implante Izquierdo*  DD-MM-AA HH:MM

*Fecha y hora Explante Izquierdo* DD-MM-AA HH:MM

*Fecha y hora Implante Derecho* DD-MM-AA HH:MM

*Fecha y hora Explante Derecho*  DD-MM-AA HH:MM

*Fecha y hora Implante ECMO* DD-MM-AA HH:MM

*Fecha y hora Explante ECMO* DD-MM-AA HH:MM

*Fecha Trasplante (si procede)* DD-MM-AA

**ANTECEDENTES**

*Esternotomía Previa*

1=No 2=Una 3=Dos 4=Tres o más

*Post-Cardiotomía Tipo Cirugía*

1=No 2=Coronaria 3=Valvular 4=Combinada 5=Trasplante 6=Aorta 7=Congénito 8=Otra

*Insuficiencia Cardiaca*

1=Izquierda 2=Derecha 3=Biventricular

*Patología de Base de la Miocardiopatía*

1. Idiopática 2. Isquémica 3. Valvular 4. Congénita 5. Otras miocardiopatías (señalar) 6. Re-Trasplante 7. Ninguna

*Fracción Eyección VI* %

**GRUPO DIAGNÓSTICO**

*Indicación*

1. Post – Cardiotomía

2. Post - Infarto agudo de miocardio

3. Miocarditis aguda

4. Pre - Trasplante (Insuficiencia Cardiaca Crónica reagudizada)

5. Post - Trasplante (Fallo Primario del Injerto)

6. Terapia Definitiva

7. Otras (señalar)

8. Fallo Respiratorio

*Objetivo*

1. Recuperación

2. Puente al Trasplante

3. Puente a otra Asistencia

4. Definitiva

**DATOS DEL IMPLANTE**

*BCIA Previo*

1=No 2=Si

*BCIA Post-Asistencia*

1=No 2=Si

*Implante con CEC*

1=No 2=Si

*Tiempo CEC*  minutos

*Clampaje aórtico*

1=No 2=Si

*Tiempo Clampaje*  minutos

*Tipo Asistencia*

1=Izquierda 2=Derecha 3=Biventricular inicial 4=ECMO

**DISPOSITIVO IZQUIERDO**

*Modelo* Según Lista dispositivos VAD Registro

*Cánula entrada*

1=Vena Pulmonar 2= Techo AI 3=Ápex VI 4=Orejuela izquierda

*Cánula salida*

1=Aorta Ascendente 2=Aorta Descendente

*Duración Asistencia Izquierda* Cálculo automático NO RELLENAR

**DISPOSITIVO DERECHO**

*Modelo* Según Lista dispositivos VAD Registro

*Duración Asistencia Derecha* Cálculo automático NO RELLENAR

**ECMO / SOPORTE PERCUTÁNEO**

*Modelo* Según Lista dispositivos ECMO Registro

*Cánula entrada dispositivo*

1=Vena femoral 2= Vena yugular 3=Aurícula 4=Arteria femoral 5=Arteria subclavia / Axilar 6=Aorta

*Cánula salida dispositivo*

1=Vena femoral 2=Vena yugular 3=Arteria femoral 4=Arteria subclavia/Axilar 5=Arteria carótida 6=Aorta

*Oxigenador* Señalar tipo o modelo

*Duración ECMO /Soporte*  Cálculo automático NO RELLENAR

**EVOLUCIÓN**

**OUTCOME**

*Finalización Asistencia*

1=Desconexión (Recuperación) 2=Trasplante 3=Muerte 4= Nuevo Dispositivo (*Bridge to bridge)*

**COMPLICACIONES**

**DISPOSITIVO**

*Tipo Complicaciones Dispositivo*

1=No 2=Fallo Estructural 3=Trombosis 4=Hemorragia 5=Infección 6=Hemólisis 7= Otra

**REOPERACIÓN**

*Causas Reoperación*

1=No 2=Hemorragia 3=Taponamiento 4=Mediastinitis 5=Infección tardía (dispositivo) 6=Otras (señalar)

**PULMONAR**

*Complicaciones Respiratorias*

1=No 2=Atelectasia 3=Neumonía 4=SDRA 5=TEP 6=Derrame Pleural 7=Neumotórax 8=Hemotórax 9=Otra

**TROMBOEMBOLISMO**

*Embolismo Periférico*

1=No 2=Si

*Nº episodios periféricos (Nº)*

*Días Post-Implante 1er Embolismo periférico*  Días

*Embolismo Central*

1=No 2=AIT 3=ACVA recuperado 4=ACVA con secuelas

*Nº episodios AIT (Nº)*

*Días Post-Implante 1er AIT* Días

*Nº episodios ACVA con secuela (Nº)*

*Días Post-Implante 1er ACVA secuelas*  Días

**RENAL**

*Creatinina preoperatoria* mg/dl

*Insuficiencia Renal* (Creatinina>2 mg/dl o >180 μmol/L)

1=No 2=Si

*Diálisis (Filtración)*

1=No 2=Si

*Recuperación Diálisis*

1=Retirada Diálisis 2=No retirada

**INFECCIÓN**

*Infección*

1=No 2=Respiratoria 3=Urinaria 4=Bacteriemia 5=Sepsis 6=Mediastinitis 7=Herida 8=Relativa al Dispositivo

**ANTICOAGULACIÓN**

*Régimen Anticoagulación*

1=Monoterapia 2=Combinada

*Heparina*

1=No 2=Si 3= Hirudina

*AntiVitamina K*

1=No 2=Si

*Antiagregación*

1=No 2=Si

**SUPERVIVENCIA**

*Mortalidad*

1=No 2=Sí CON asistencia 3=Sí SIN asistencia

*Mortalidad Hospitalaria*

1=No 2=Sí

*Fecha Muerte* DD-MM-AA HH:MM

*Días Muerte*  Cálculo automático NO RELLENAR

*Causa Directa Mortalidad*

0=No 1=Bajo Gasto 2=Renal 3=Neurológica 4=FMO 5=Infección 6=Respiratoria 7=Vascular 8=Digestiva 9=Hemorragia 10=Fallo Primario 11=Rechazo 12=Arritmia 13=Tromboembolia 14=Coagulopatía 15=Otra

*Causa Inicial Mortalidad (si la hubiese)*

0=No 1=Bajo Gasto 2=Renal 3=Neurológica 4=FMO 5=Infección 6=Respiratoria 7=Vascular 8=Digestiva 9=Hemorragia 10=Fallo Primario 11=Rechazo 12=Arritmia 13=Tromboembolia 14=Coagulopatía 15=Otra

**SEGUIMIENTO**

*Fecha Seguimiento* (si procede) DD-MM-AA

*Estatus en revisión*

1= Vivo 2=Muerto
